# Supplementary material for: A back-door insight into the modulation of Src kinase activity by the polyamine spermidine
Source: eLife. 2023 Jun 30;12:e85872. doi: 10.7554/eLife.85872 (PMC10328509; doi:10.7554/eLife.85872)
Supplement: Figure 1—source data 2. — Figure with the uncropped blots with relevant bands clearly labeled are provided. [file elife-85872-fig1-data2.zip]

Archive with 4 entries (4 files):
- Figure 1-source data 2/a-actin.tif
- Figure 1-source data 2/a-pSRC.tif
- Figure 1-source data 2/a-SRC.tif
- Figure 1-source data 2/Rossini et al. Figure 1D-uncropped.pdf
