# Supplementary material for: A back-door insight into the modulation of Src kinase activity by the polyamine spermidine
Source: eLife journal article supplement (doi:10.7554/elife.85872), 2023-06-30
Supplement: supp [file elife-85872-supp-v1.zip]

|              |                                                                 |     |
|--------------|-----------------------------------------------------------------|-----|
| human SRC    | MGSNKS KPKDASQRRRSLEPAENVHGAGGGAFFPASQTPSKPASADGHRGPSAAAFAPAAAE | 60  |
| murine SRC   | MGSNKS KPKDASQRRRSLEPSENVHGAG-GAFFPASQTPSKPASADGHRGPSAAAFVPPAAE | 59  |
| 2JYQ_1 Chain | -----                                                           | 0   |
| human SRC    | PKLFGGFNSSDTVTSPQRAGPLAGGVTTFFVALYDYESRTETDLSFKKGERLQIVNNTEGD   | 120 |
| murine SRC   | PKLFGGFNSSDTVTSPQRAGPLAGGVTTFFVALYDYESRTETDLSFKKGERLQIVNNTEGD   | 119 |
| 2JYQ_1 Chain | -----                                                           | 0   |
| human SRC    | WWLAHSLSTGQTGYIPSNYVAPSDSIQAE EWYFGKITRRESERLLLLNAENPRGTFVLVRES | 180 |
| Murine SRC   | WWLAHSLSTGQTGYIPSNYVAPSDSIQAE EWYFGKITRRESERLLLLNAENPRGTFVLVRES | 179 |
| 2JYQ_1 Chain | -----QAE EWYFGKITRRESERLLLLNPEENPRGTFVLVRES                     | 34  |
|              | *****                                                           |     |
| human SRC    | ETTKGAYCLSVSDFDNAKGLNVKHYKIRKLDSGGFYITSRTQFNSLQQLVAYYSKHADGL    | 240 |
| Murine SRC   | ETTKGAYCLSVSDFDNAKGLNVKHYKIRKLDSGGFYITSRTQFNSLQQLVAYYSKHADGL    | 239 |
| 2JYQ_1 Chain | ETTKGAYCLSVSDFDNAKGLNVKHYKIRKLDSGGFYITSRTQFSSLQQLVAYYSKHADGL    | 94  |
|              | *****                                                           |     |
| Human SRC    | CHRLTTVCPTSKPQTQGLAKDAWEIPRESLRLEVKLGGQCFGEVWMGTWNGTTRVAIKTL    | 300 |
| murine SRC   | CHRLTTVCPTSKPQTQGLAKDAWEIPRESLRLEVKLGGQCFGEVWMGTWNGTTRVAIKTL    | 299 |
| 2JYQ_1 Chain | CHRLTNVCPTSK-----                                               | 106 |
|              | *****                                                           |     |
| Human SRC    | KPGTMSPEAFLQEAQVMKKLRHEKLVQLYAVVSEEPYIYVTEYMSKGSLLDFLKGETGKY    | 360 |
| murine SRC   | KPGTMSPEAFLQEAQVMKKLRHEKLVQLYAVVSEEPYIYVTEYMNKGSLLDFLKGETGKY    | 359 |
| 2JYQ_1 Chain | -----                                                           | 106 |
|              |                                                                 |     |
| human SRC    | LRLPQLVDMAAQIASGMAYVERMNYVHRDLRAANILVGENLVCKVADFGLARLIEDNEYT    | 420 |
| murine SRC   | LRLPQLVDMSAQIASGMAYVERMNYVHRDLRAANILVGENLVCKVADFGLARLIEDNEYT    | 419 |
| 2JYQ_1 Chain | -----                                                           | 106 |
| human SRC    | ARQGAKFFIKWTAPEAAALYGRFTIKSDVWSFGILLTELTTKGRVPYPGMVNREVLDQVER   | 480 |
| murine SRC   | ARQGAKFFIKWTAPEAAALYGRFTIKSDVWSFGILLTELTTKGRVPYPGMVNREVLDQVER   | 479 |
| 2JYQ_1 Chain | -----                                                           | 106 |
| human SRC    | GYRMPCPPECPESLHDLMCQCWRKEPEERPTFEYLAFLDYFTSTEPQYQPGENL          | 536 |
| murine SRC   | GYRMPCPPECPESLHDLMCQCWRKEPEERPTFEYLAFLDYFTSTEPQYQPGENL          | 535 |
| 2JYQ_1 Chain | -----                                                           | 106 |
