# Supplementary figures and images for: A back-door insight into the modulation of Src kinase activity by the polyamine spermidine
Source: eLife journal article supplement (doi:10.7554/elife.85872), 2023-06-30

Rossini et al. Raw Figure 1D (revised)

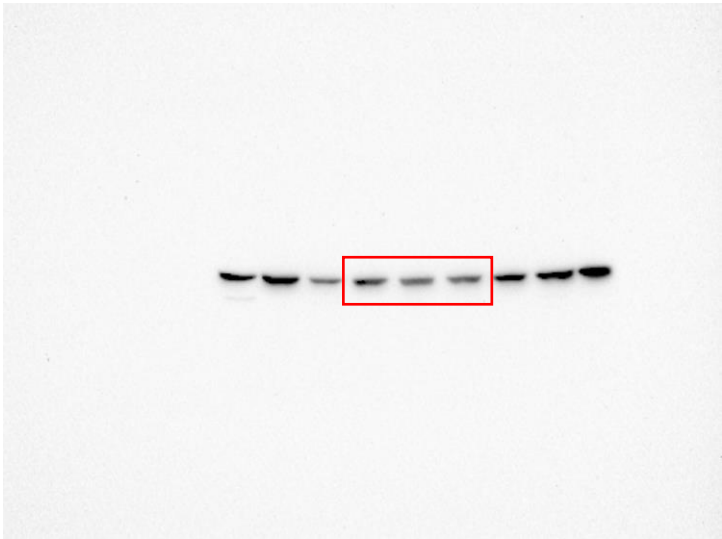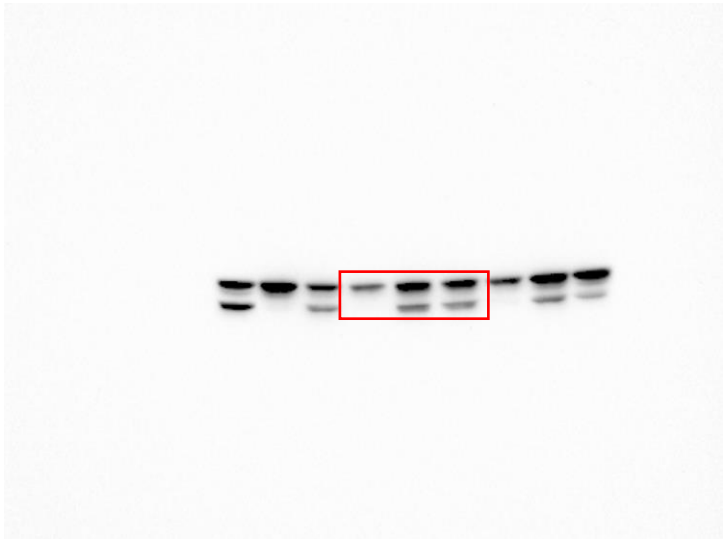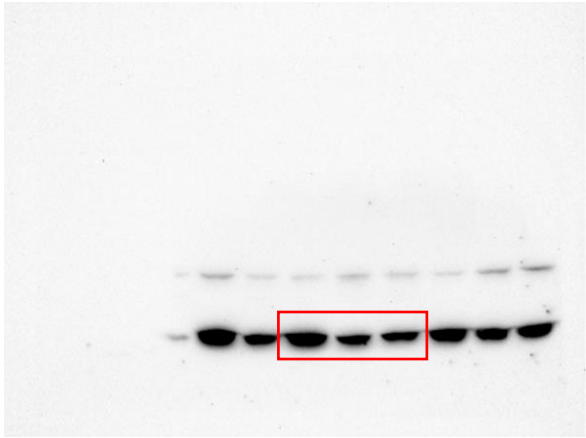

Supplement: supp [file elife-85872-supp-v1.zip]

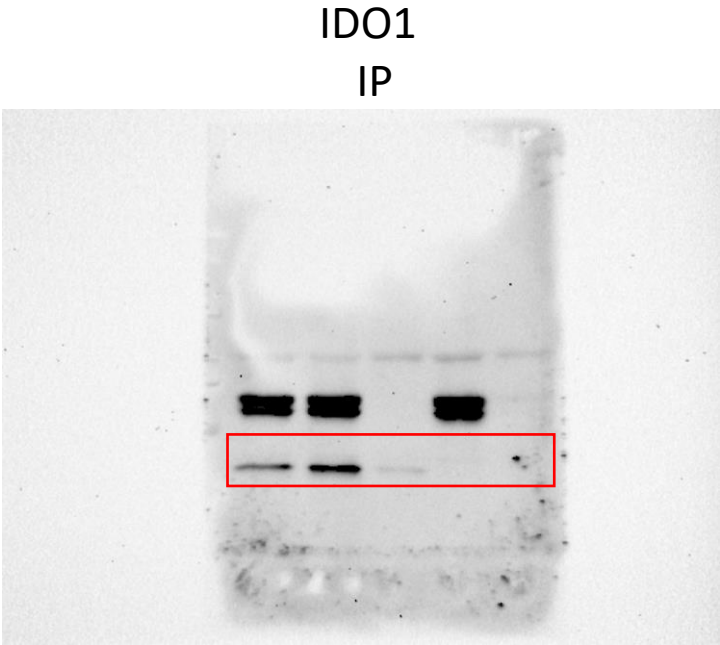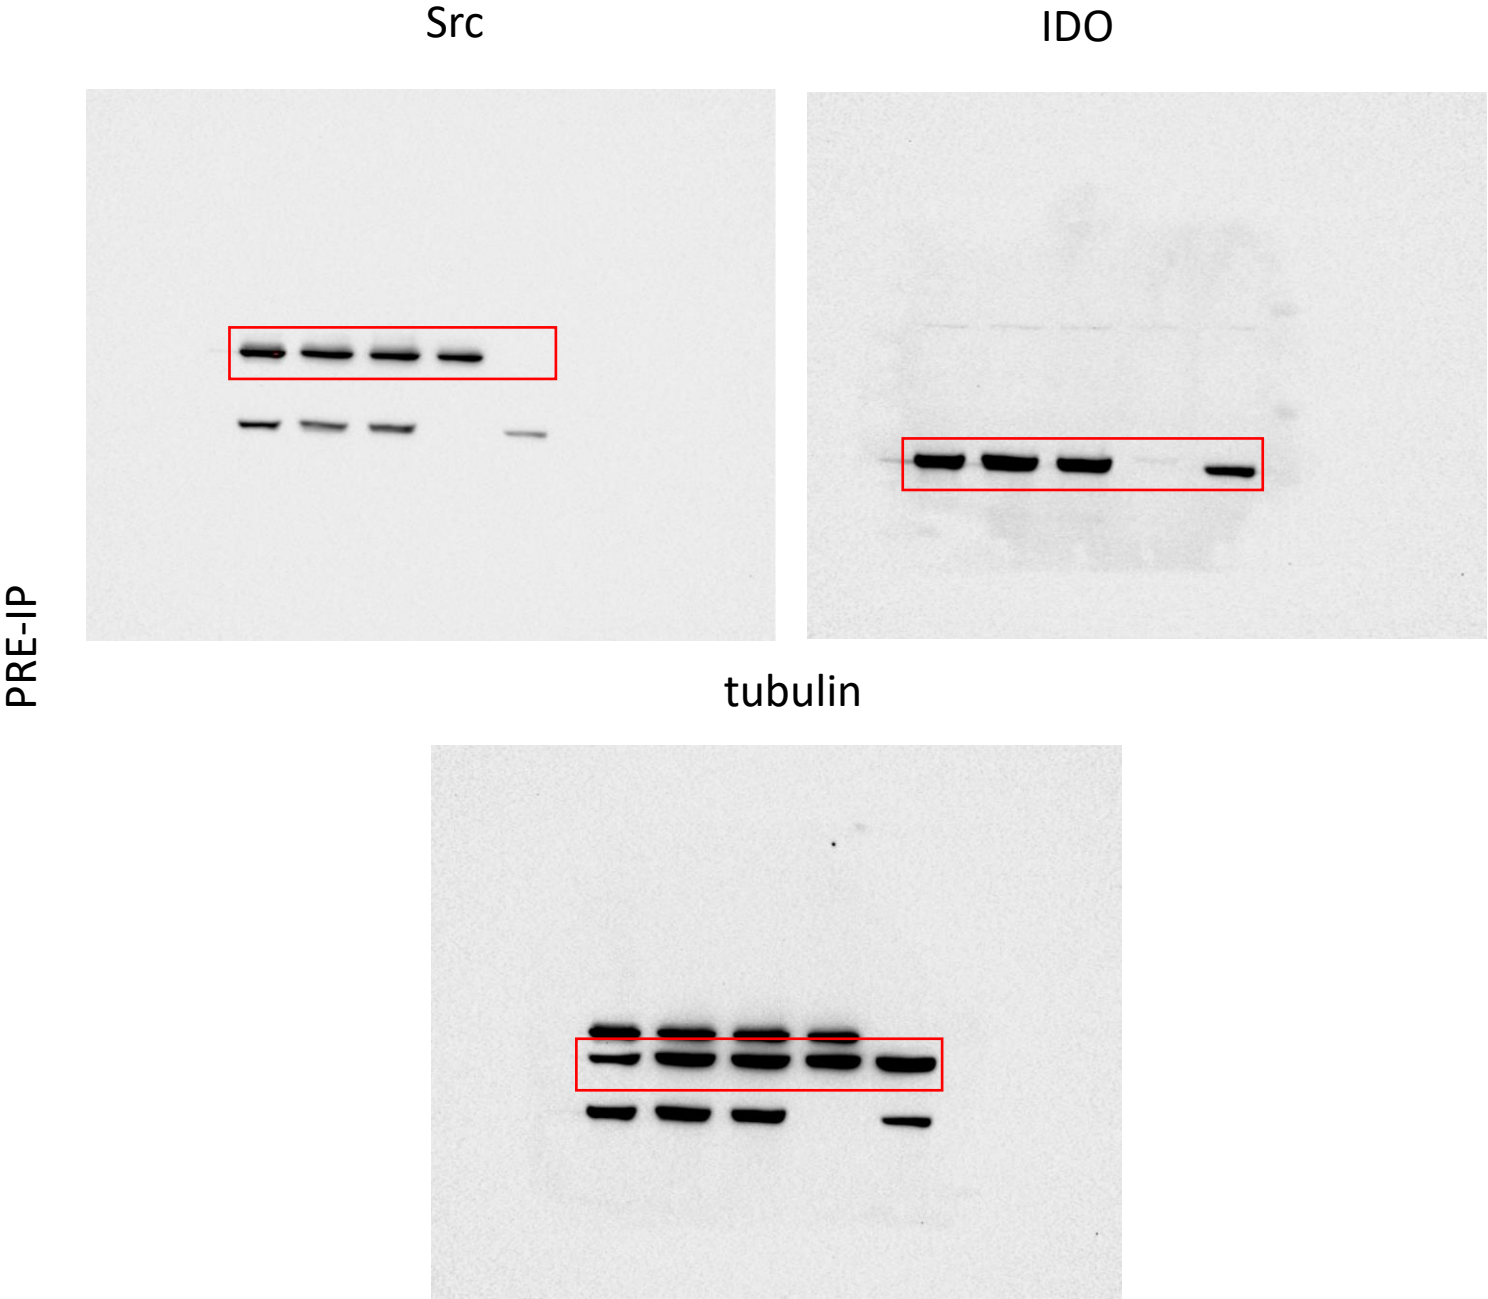

Supplement: supp [file elife-85872-supp-v1.zip]

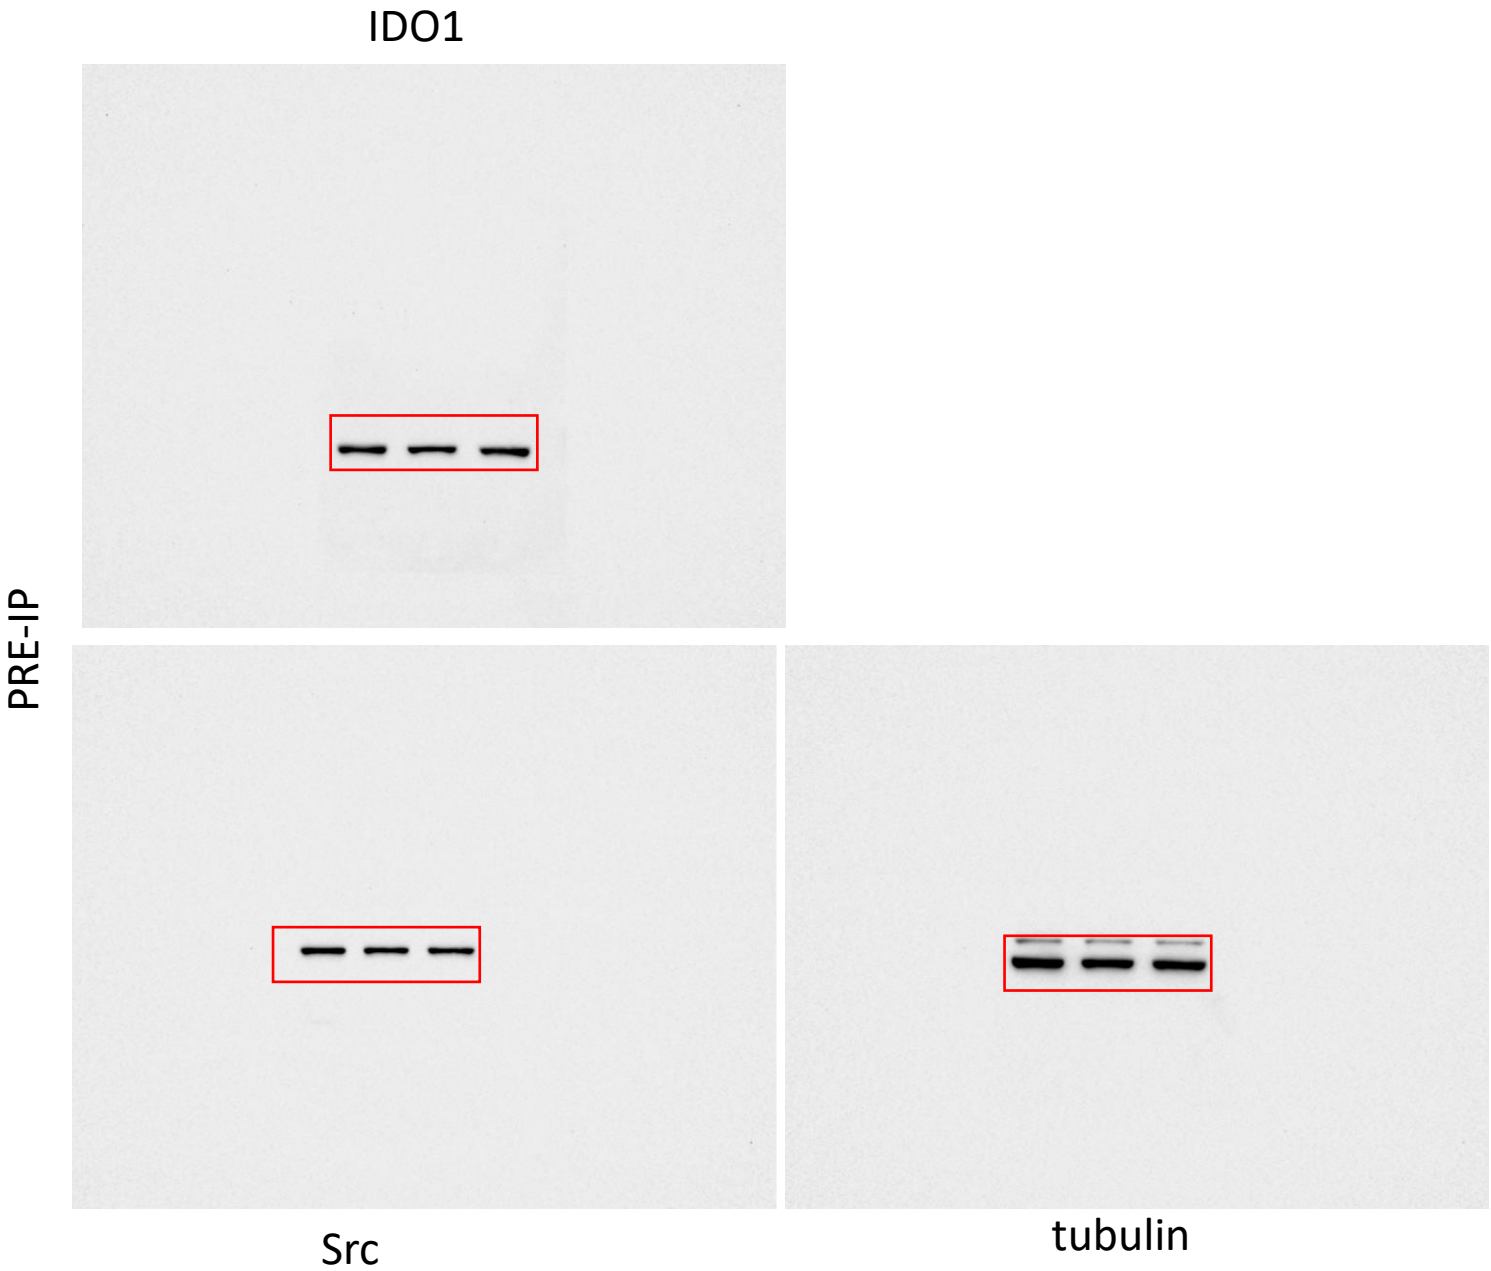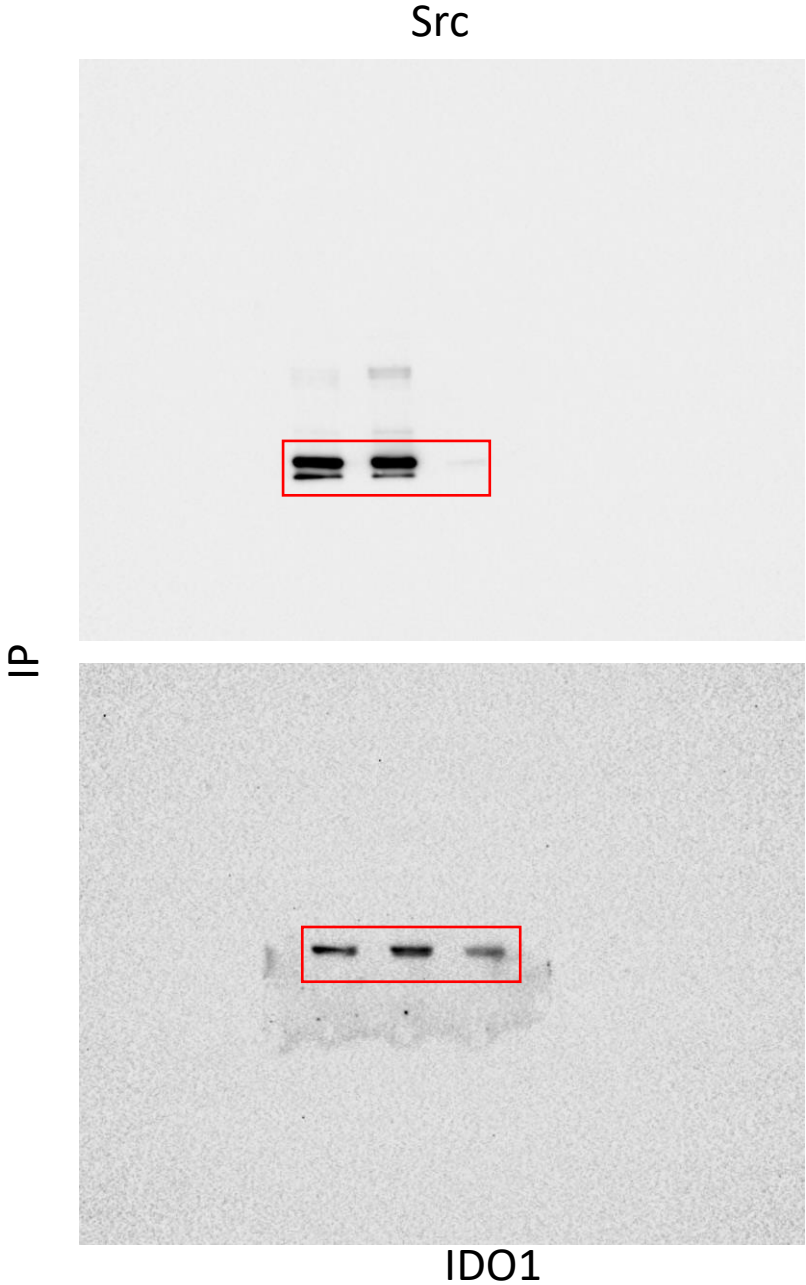

Supplement: supp [file elife-85872-supp-v1.zip]

pTYR

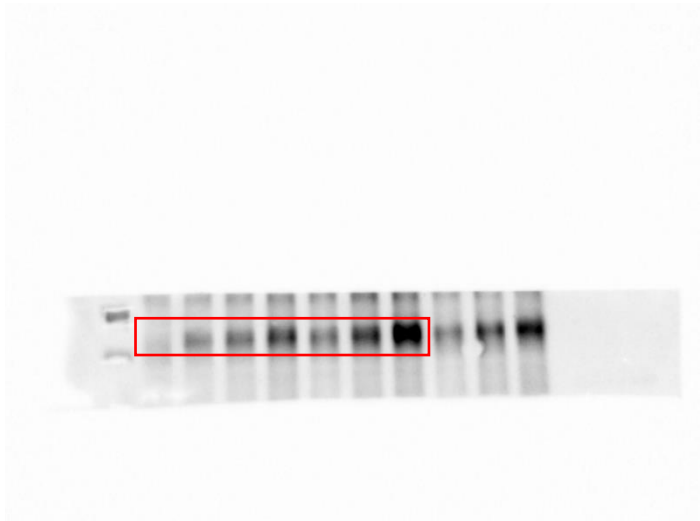

IDO1

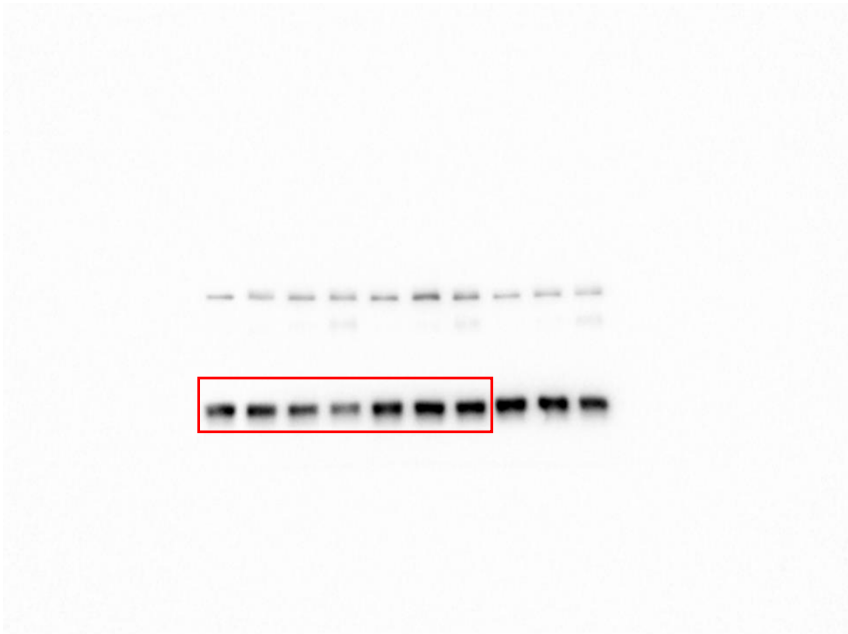

Supplement: supp [file elife-85872-supp-v1.zip]

pSrc

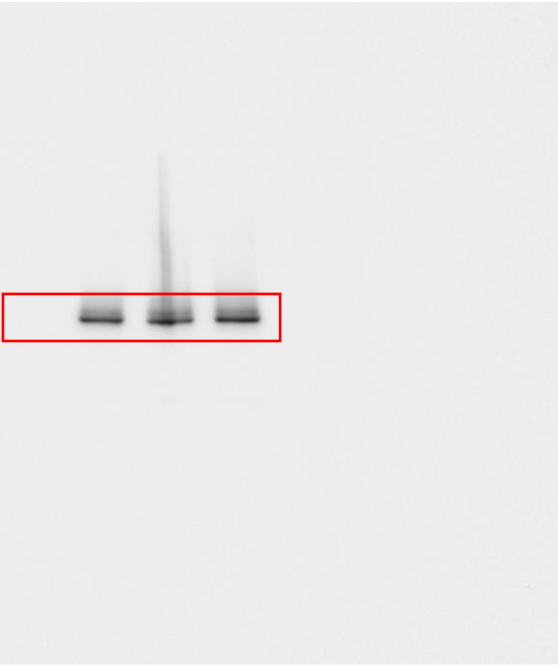

Src

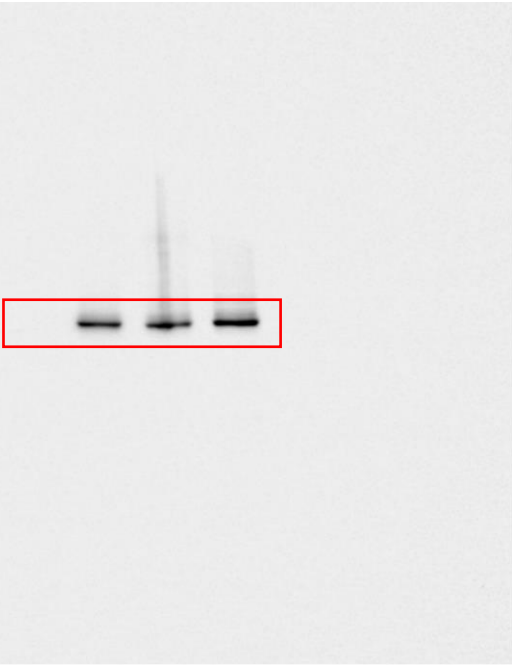

Actin

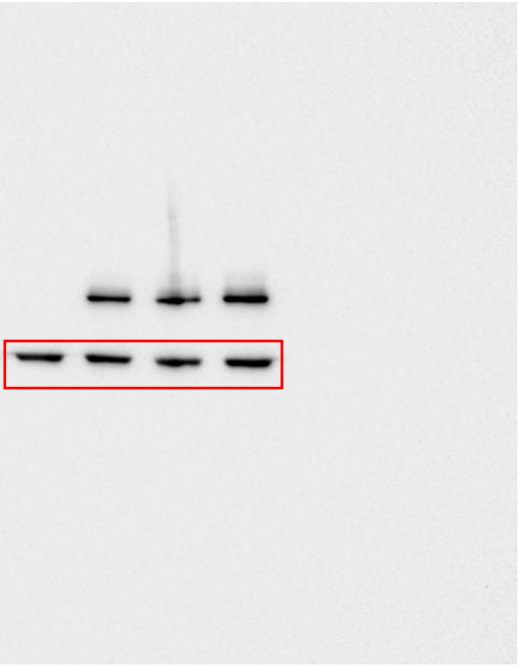

Supplement: supp [file elife-85872-supp-v1.zip]

PRE-IP

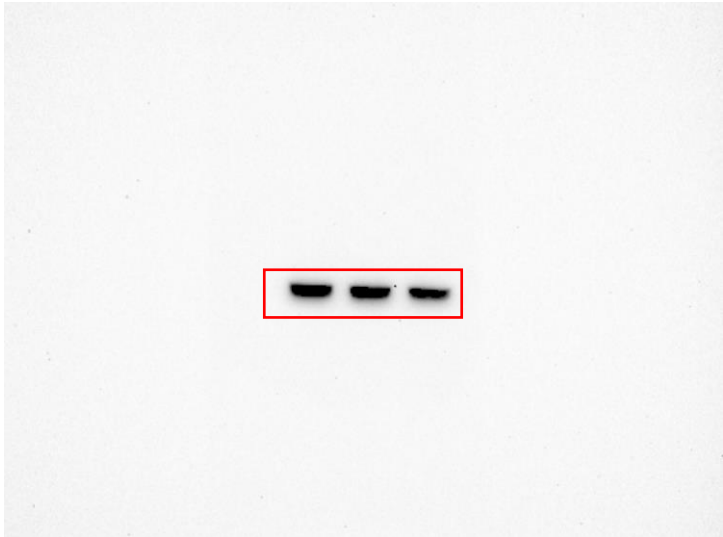

Src

IP

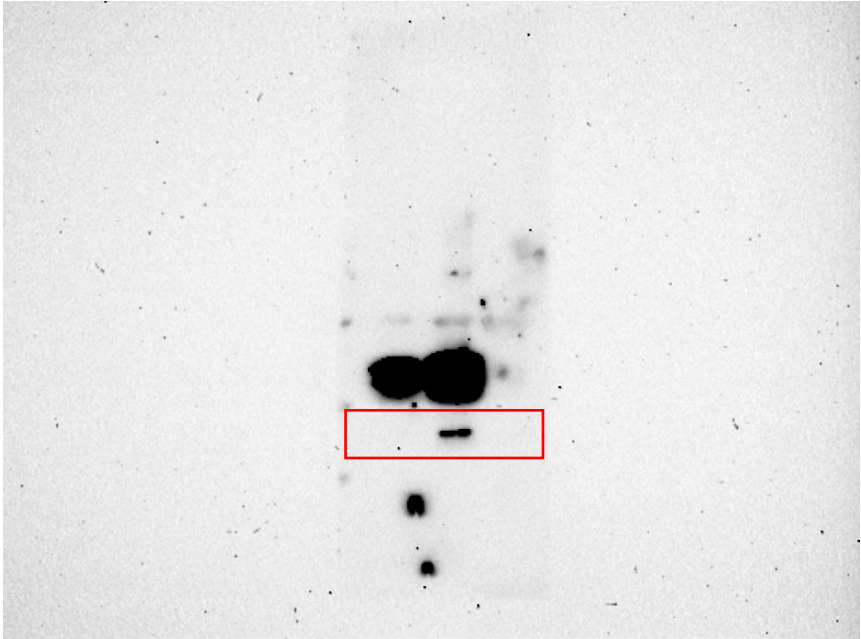

IDO1

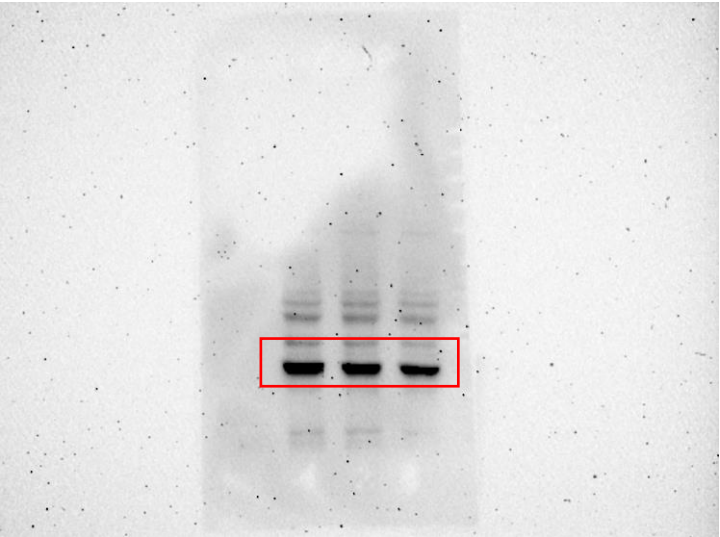

Actin

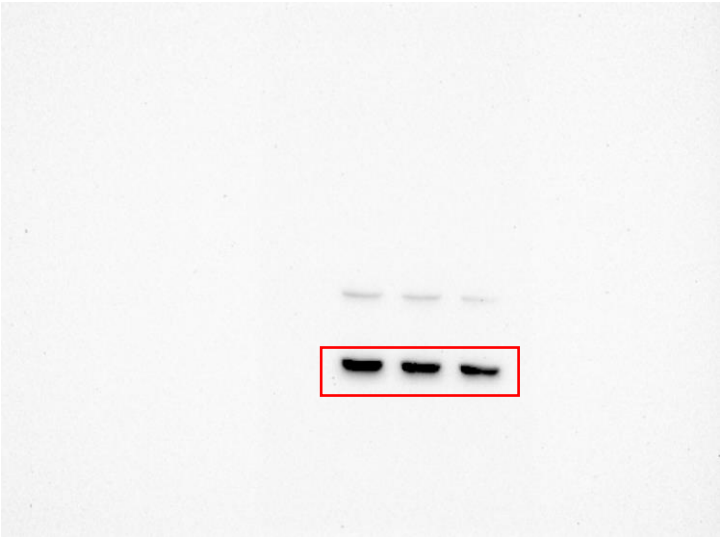

Supplement: supp [file elife-85872-supp-v1.zip]

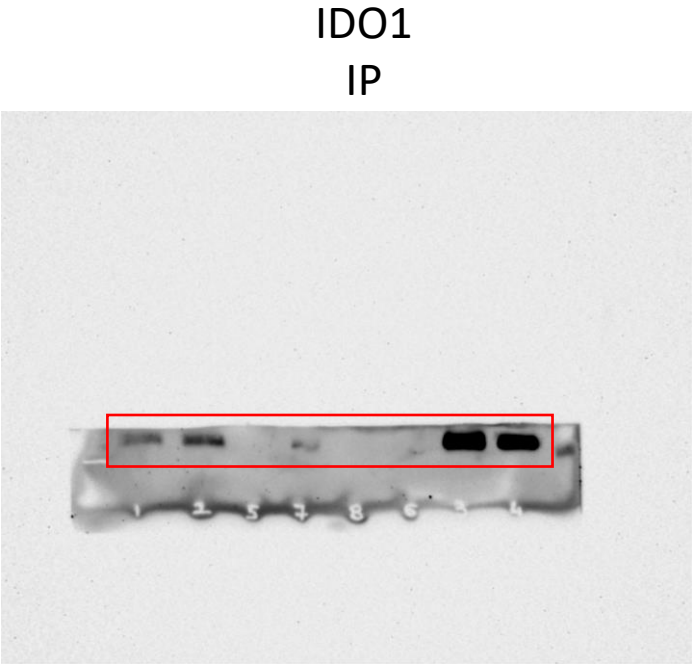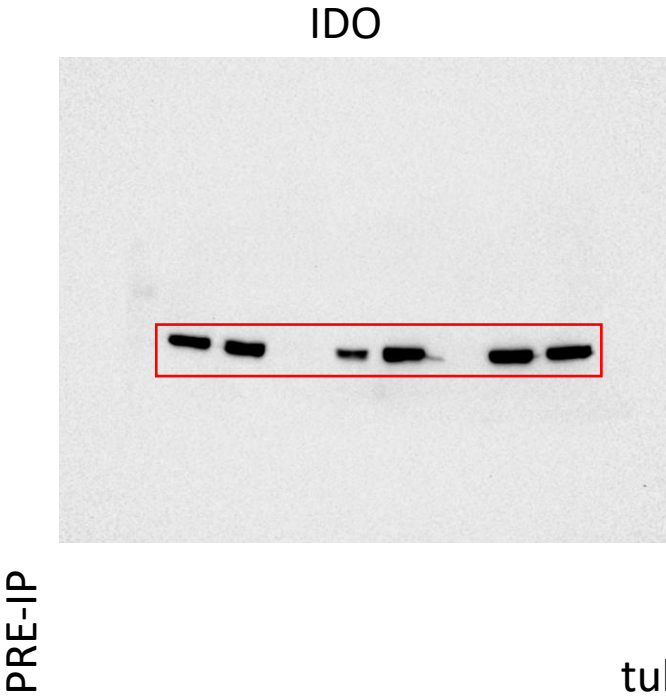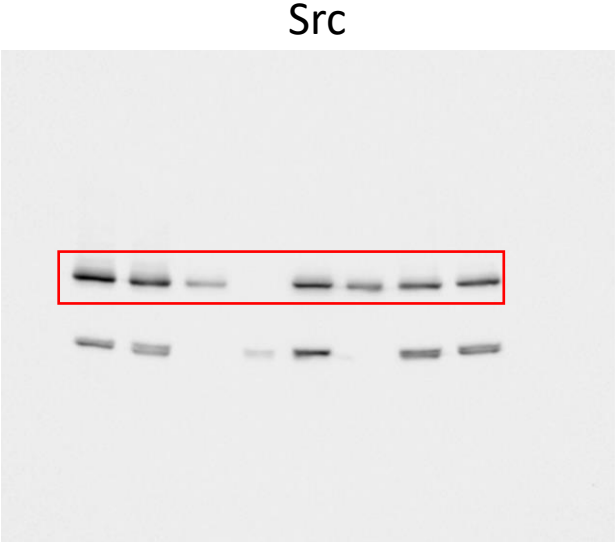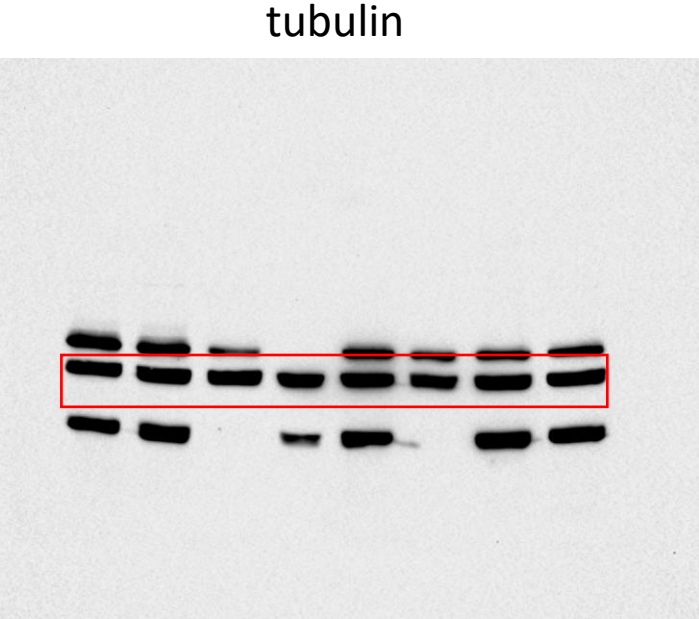

Supplement: supp [file elife-85872-supp-v1.zip]

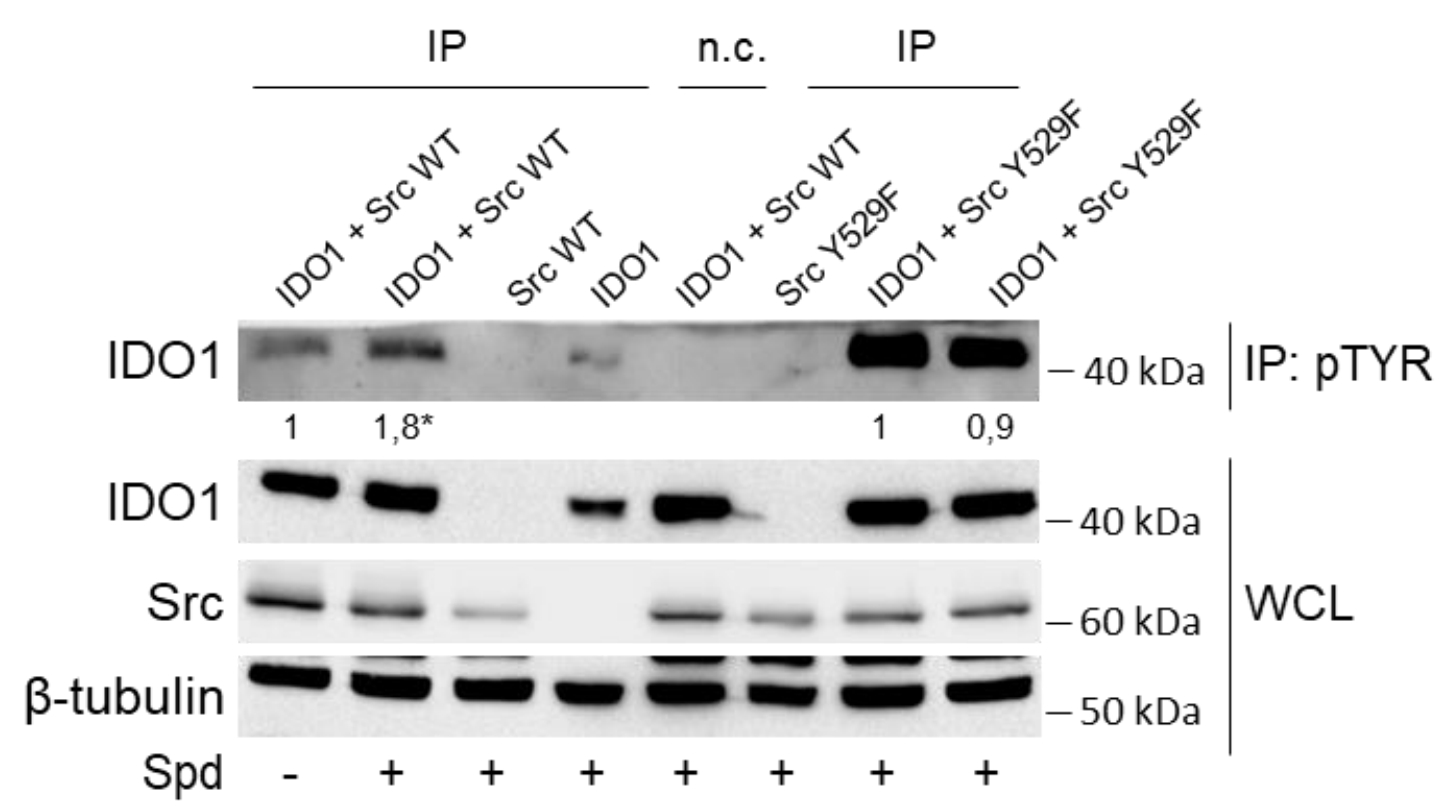

Supplement: supp [file elife-85872-supp-v1.zip]

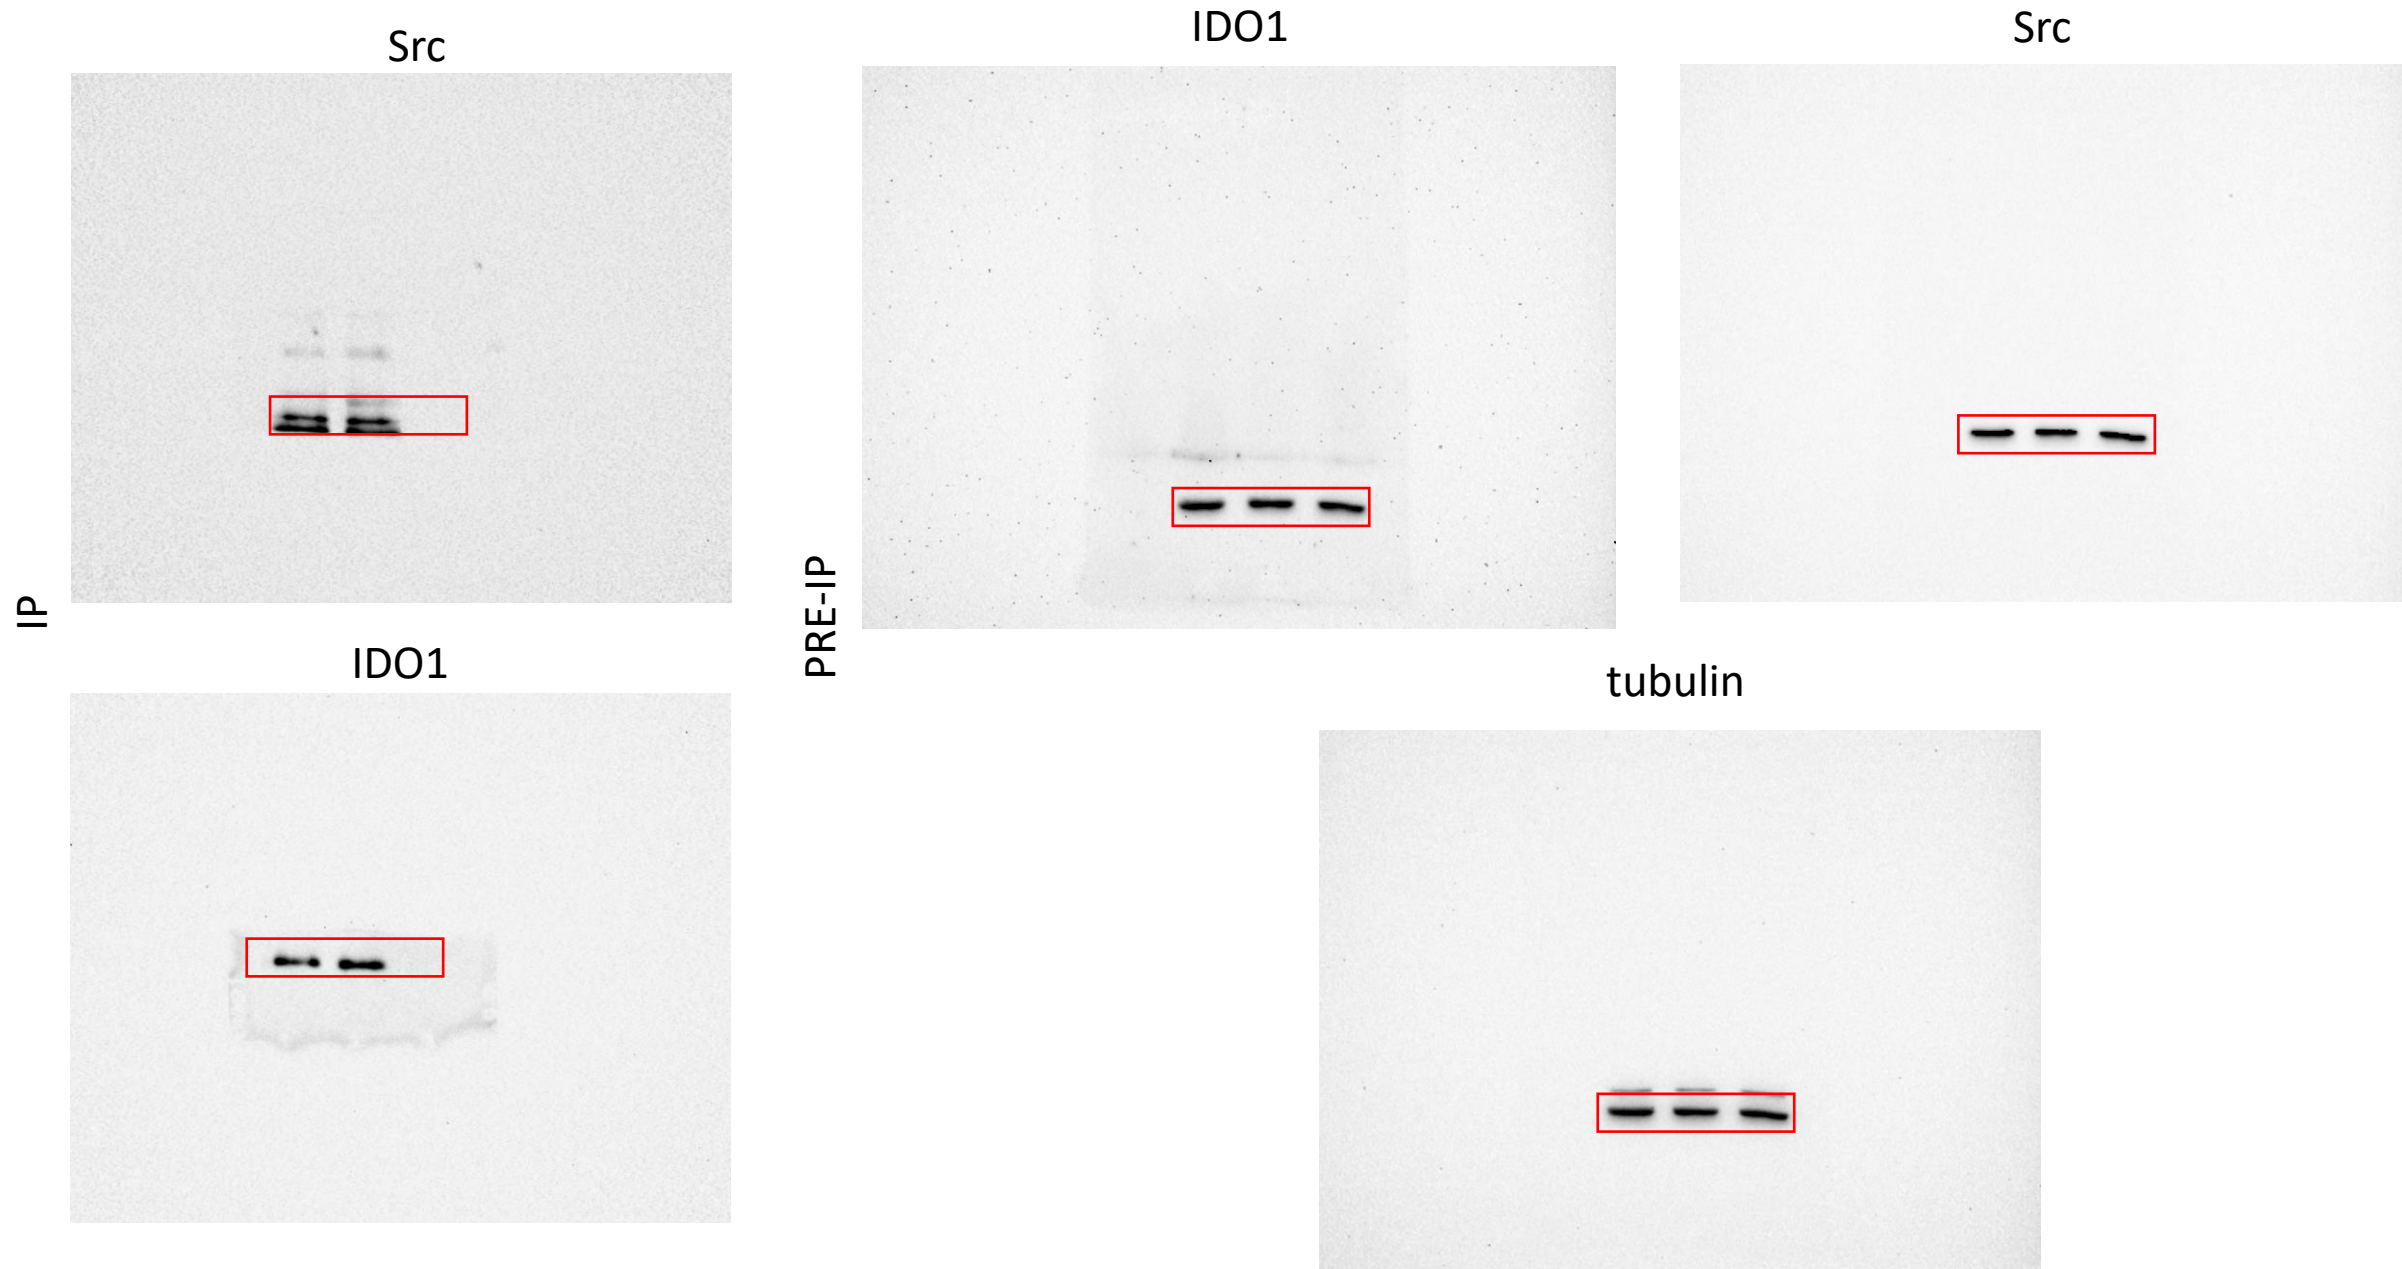

Supplement: supp [file elife-85872-supp-v1.zip]

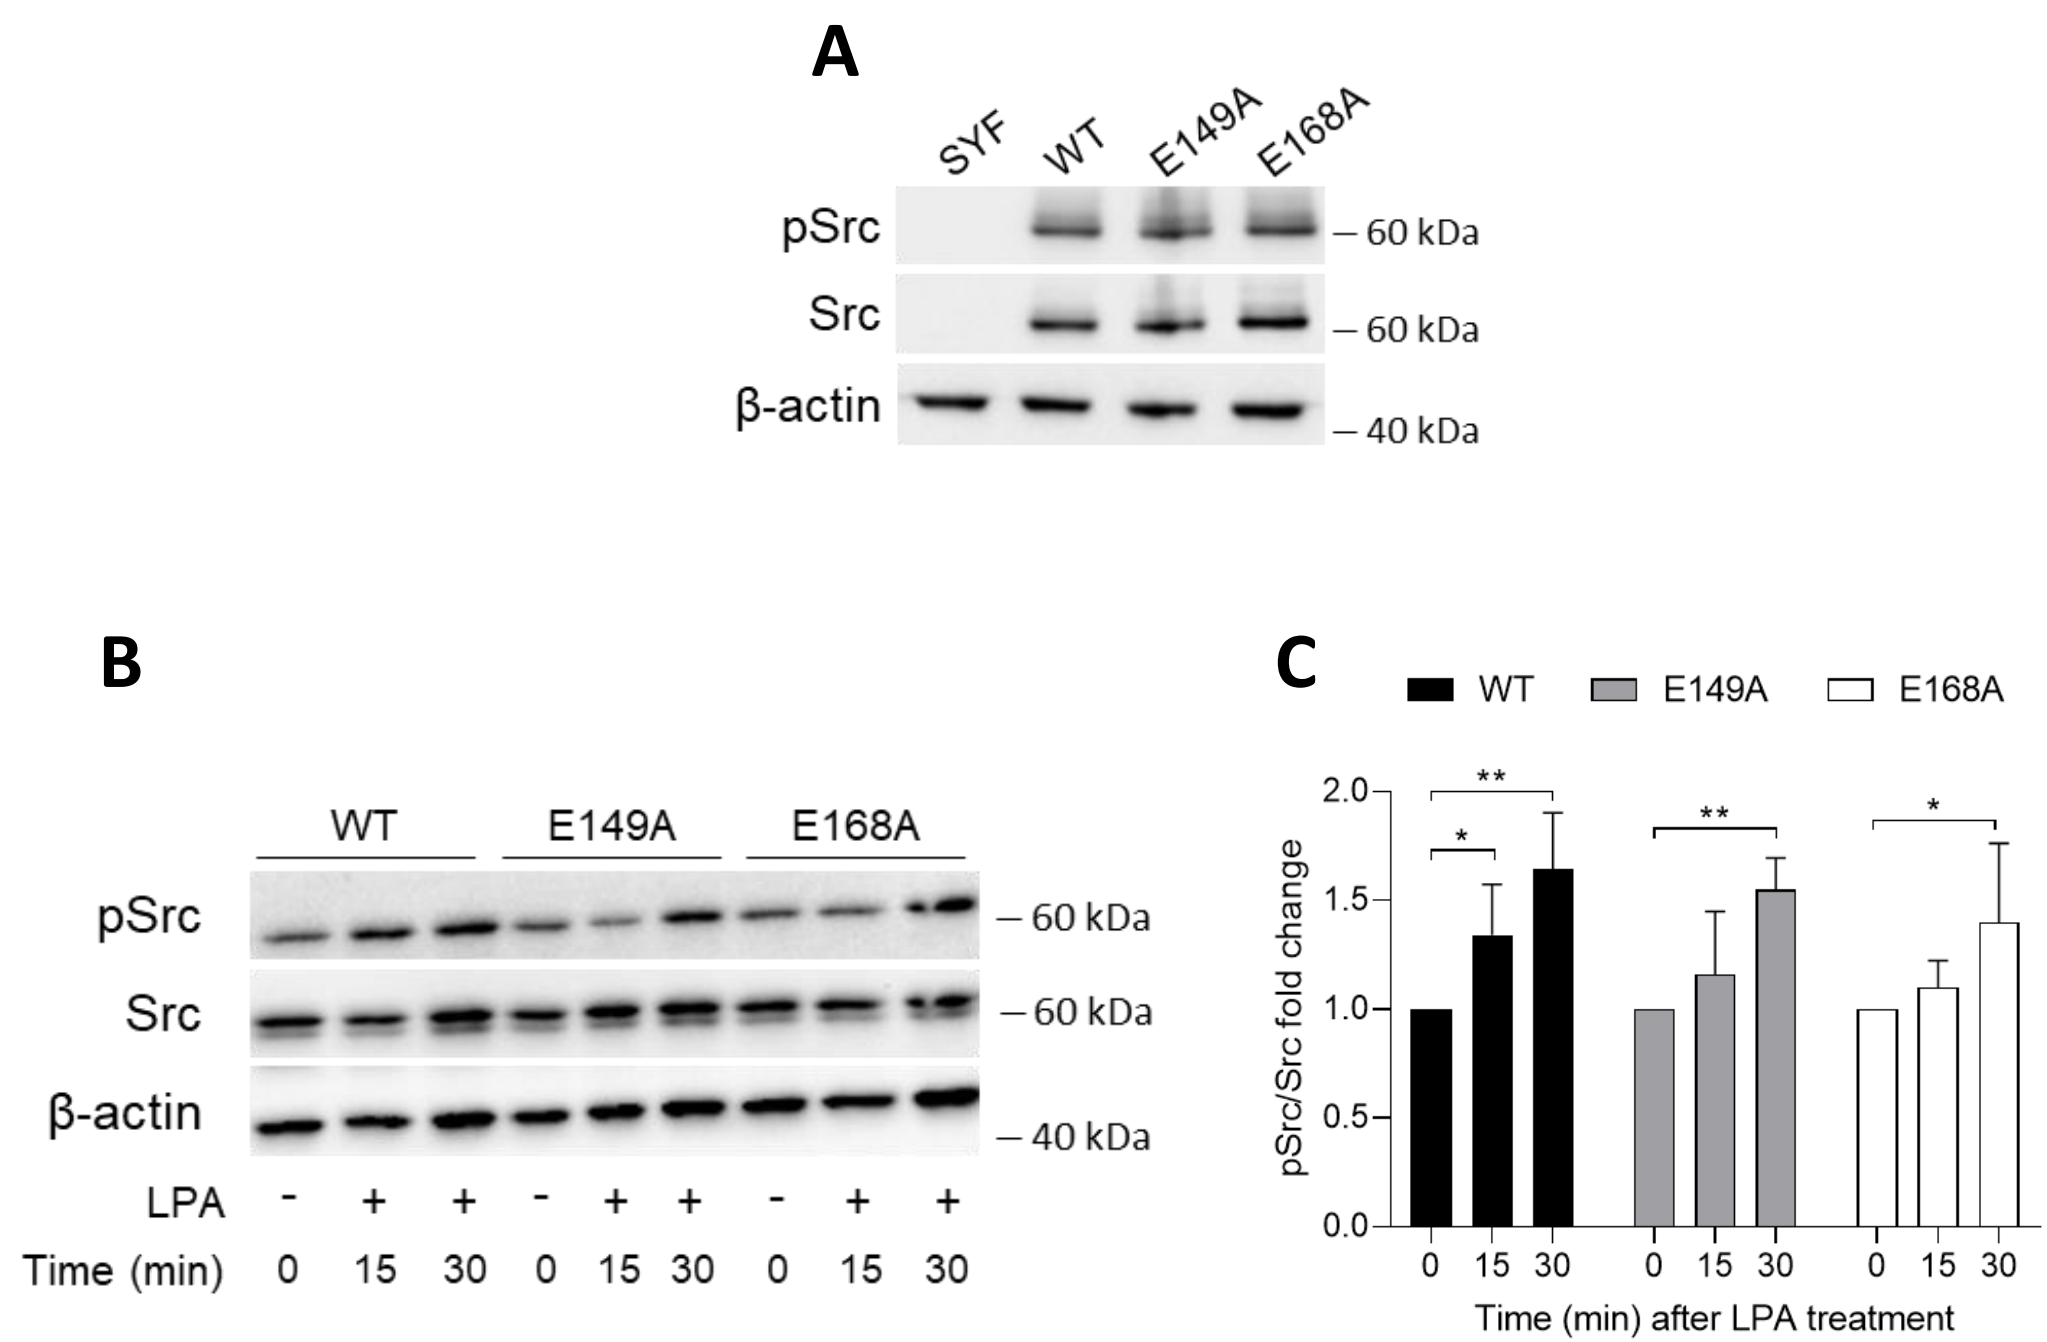

Supplement: supp [file elife-85872-supp-v1.zip]

pSrc

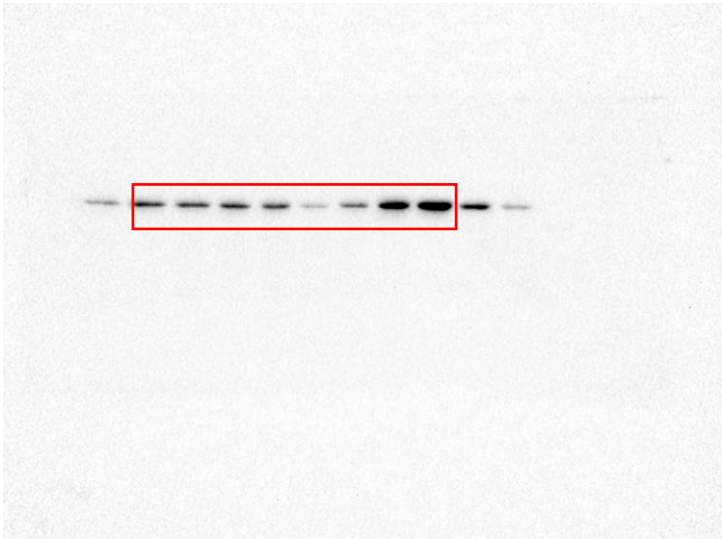

Src

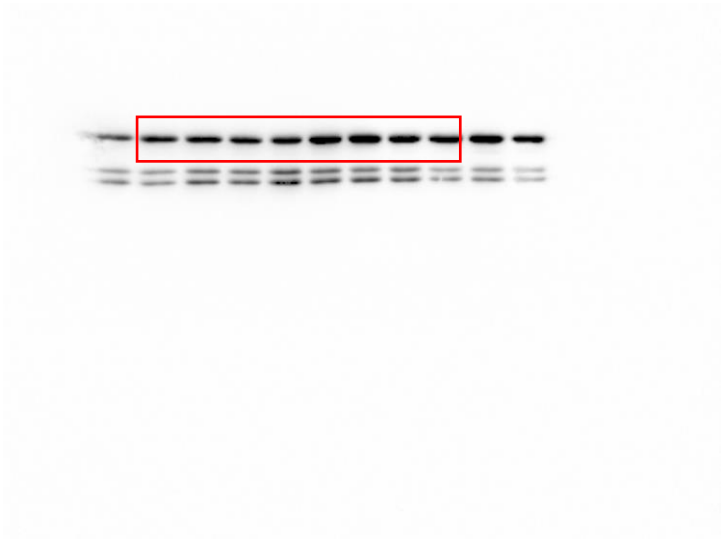

Tubulin

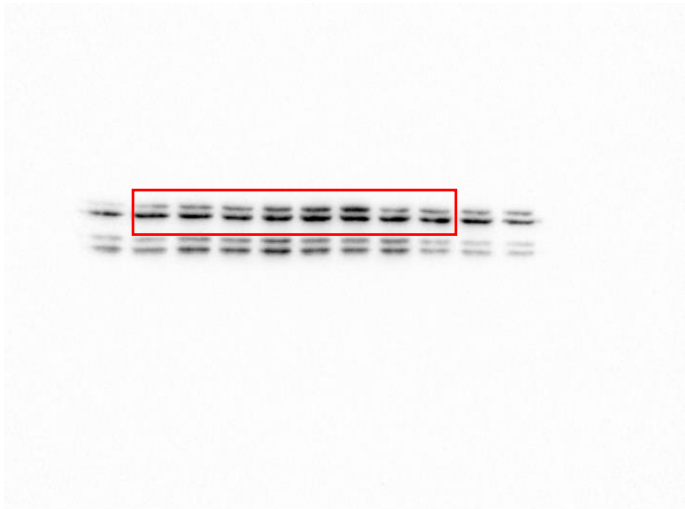

Supplement: supp [file elife-85872-supp-v1.zip]

pSrc

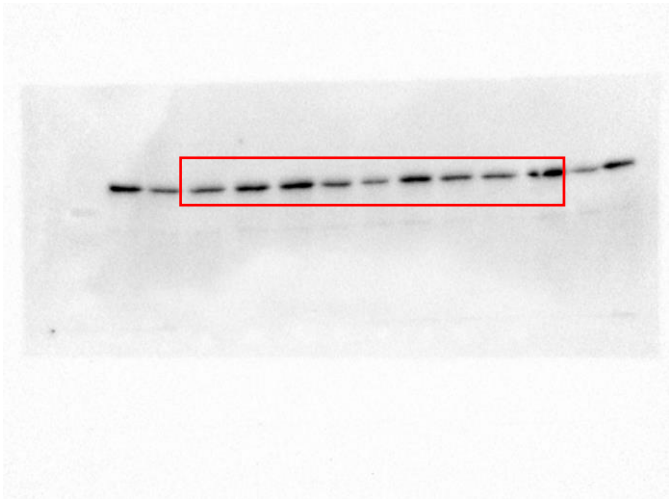

Src

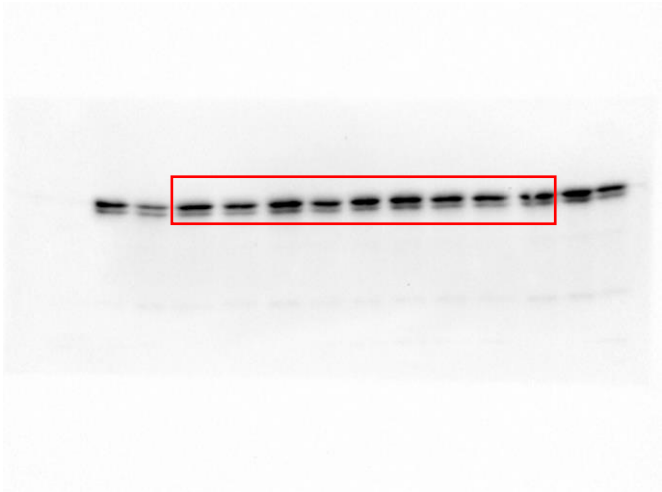

actin

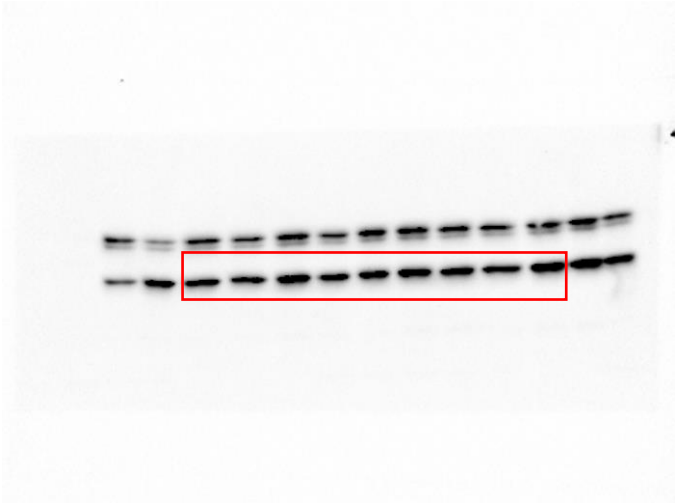

Supplement: supp [file elife-85872-supp-v1.zip]

**A**

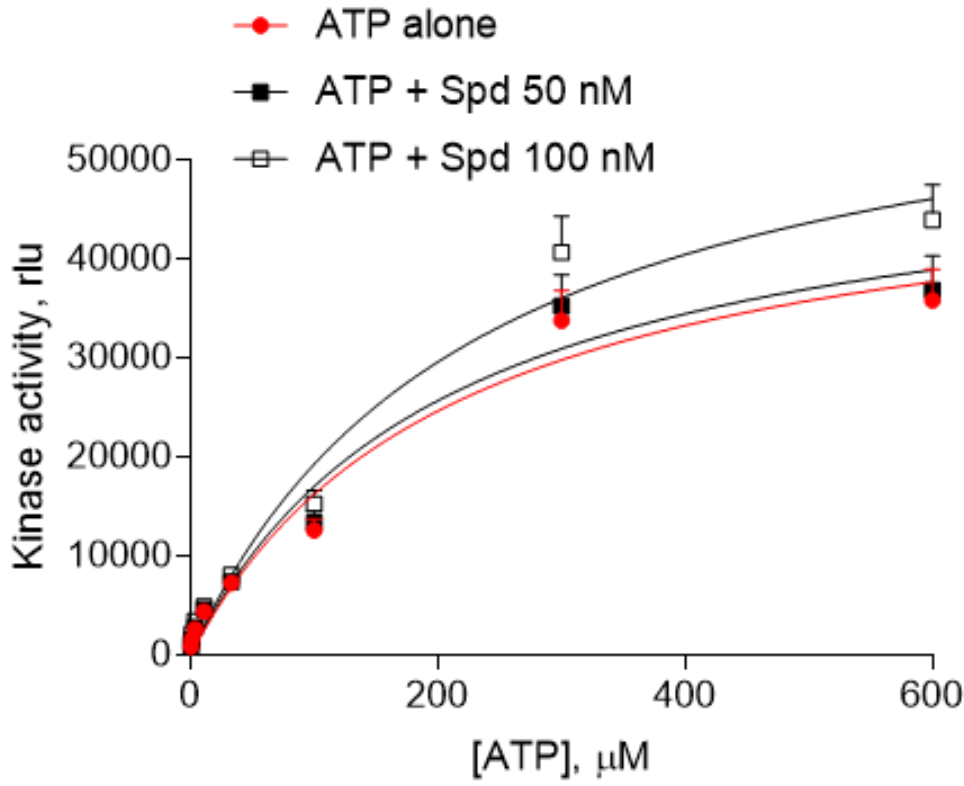

|                     | Vmax (rlu)         | Km ( $\mu\text{M}$ ) |
|---------------------|--------------------|----------------------|
| Untreated           | 51.266 $\pm$ 7.086 | 215,4 $\pm$ 74,6     |
| Spermidine (100 nM) | 63.641 $\pm$ 8.837 | 231,8 $\pm$ 78,1     |

**B**

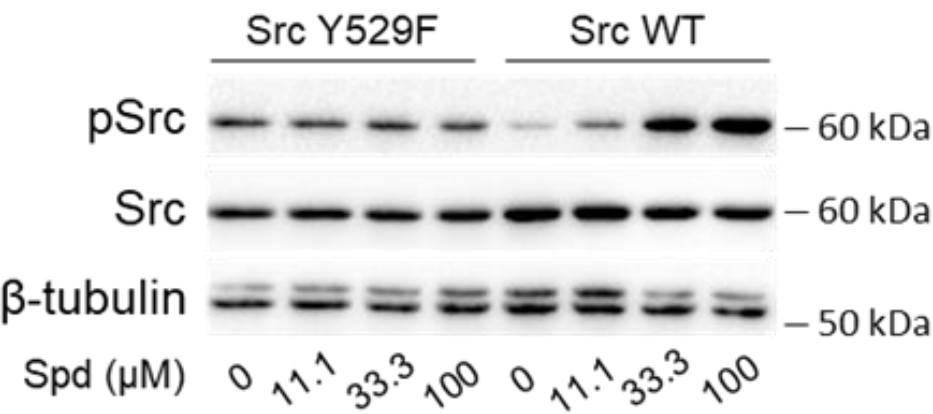

Supplement: supp [file elife-85872-supp-v1.zip]

pSrc

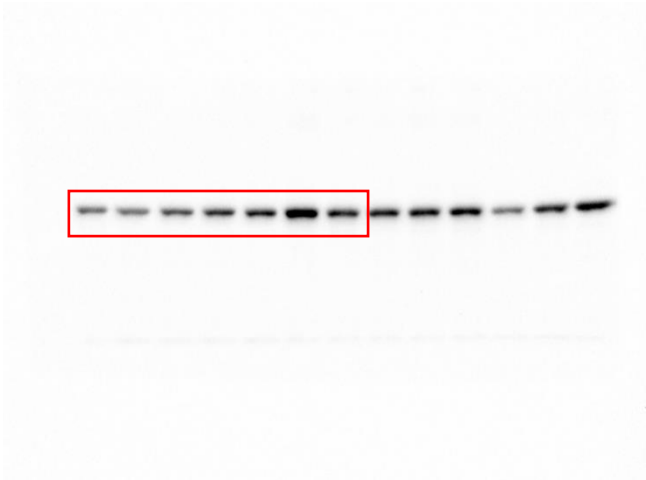

Src

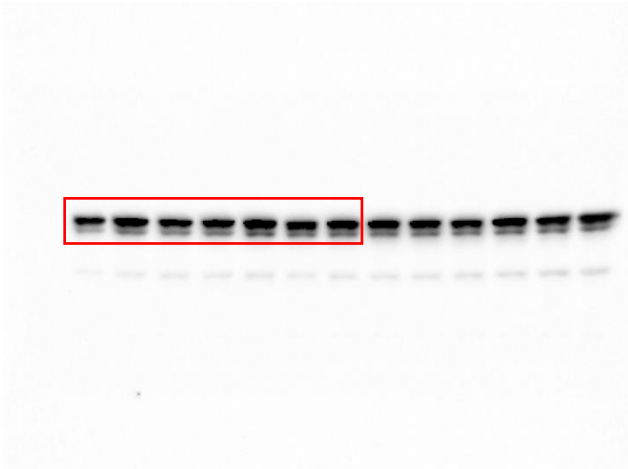

Actin

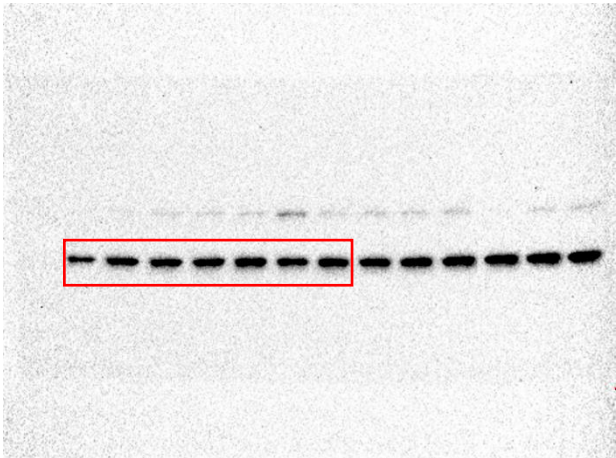

Supplement: supp [file elife-85872-supp-v1.zip]

Rossini et al. Raw Figure 2E (revised)

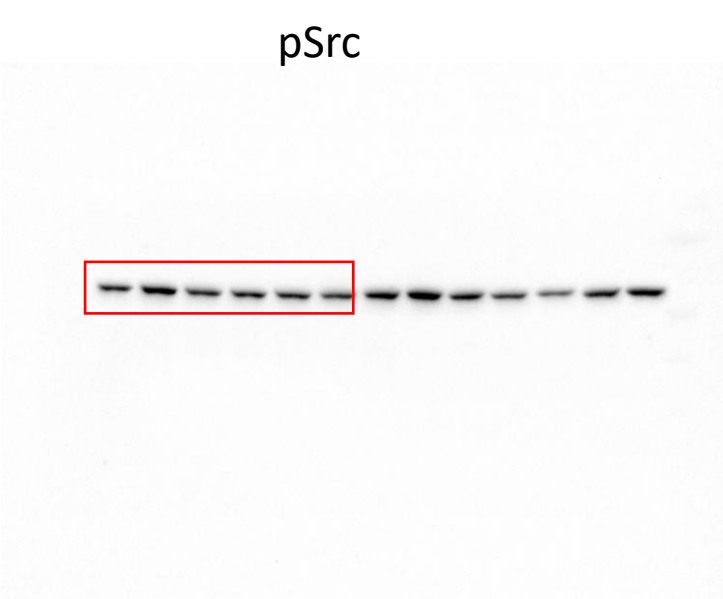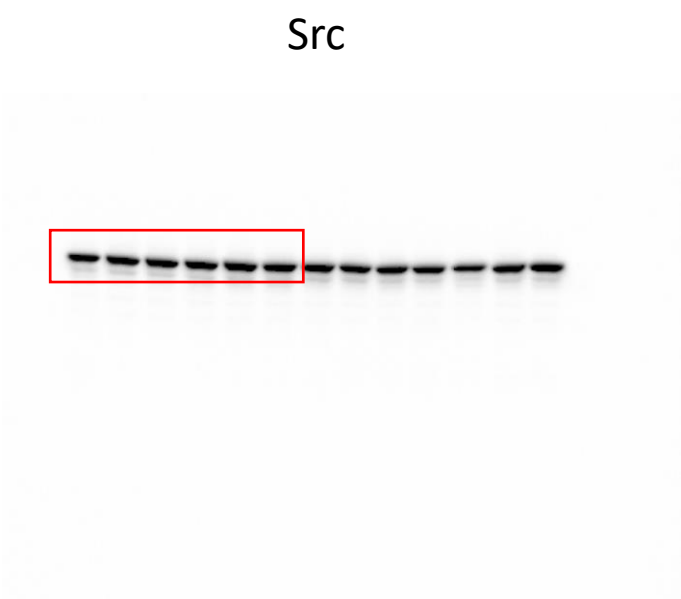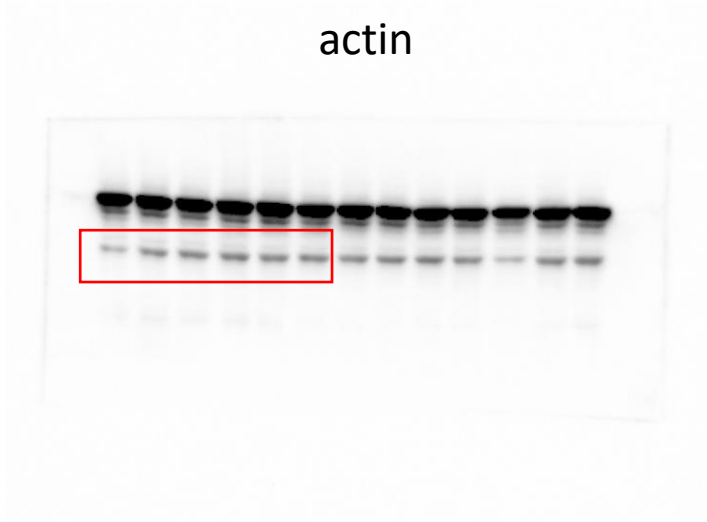

Supplement: supp [file elife-85872-supp-v1.zip]
